# Supplementary material for: Microwave-assisted reductive cyclization: an easy entry to the indoloquinolines and spiro[2H-indole-2,3′-oxindole]
Source: Royal Society of Chemistry journal article supplement (doi:10.1039/c4ra02814g), 2014-01-01

**Microwave-assisted reductive cyclization: An easy entry to the indoloquinolines and  
spiro[2*H*-indole-2,3'-oxindole]**

Prakash T. Parvatkar\* and Mahesh S. Majik

Bio-organic Chemistry Laboratory, CSIR-National Institute of Oceanography, Dona Paula, Goa  
403 004, India.

\*pparvatkar@yahoo.com

**Supporting Information Index**

<sup>1</sup>H and <sup>13</sup>C NMR spectra of all the synthesized compounds 2-9

Figure S1. <sup>1</sup>H NMR (300 MHz, DMSO-d<sub>6</sub>) of 16.

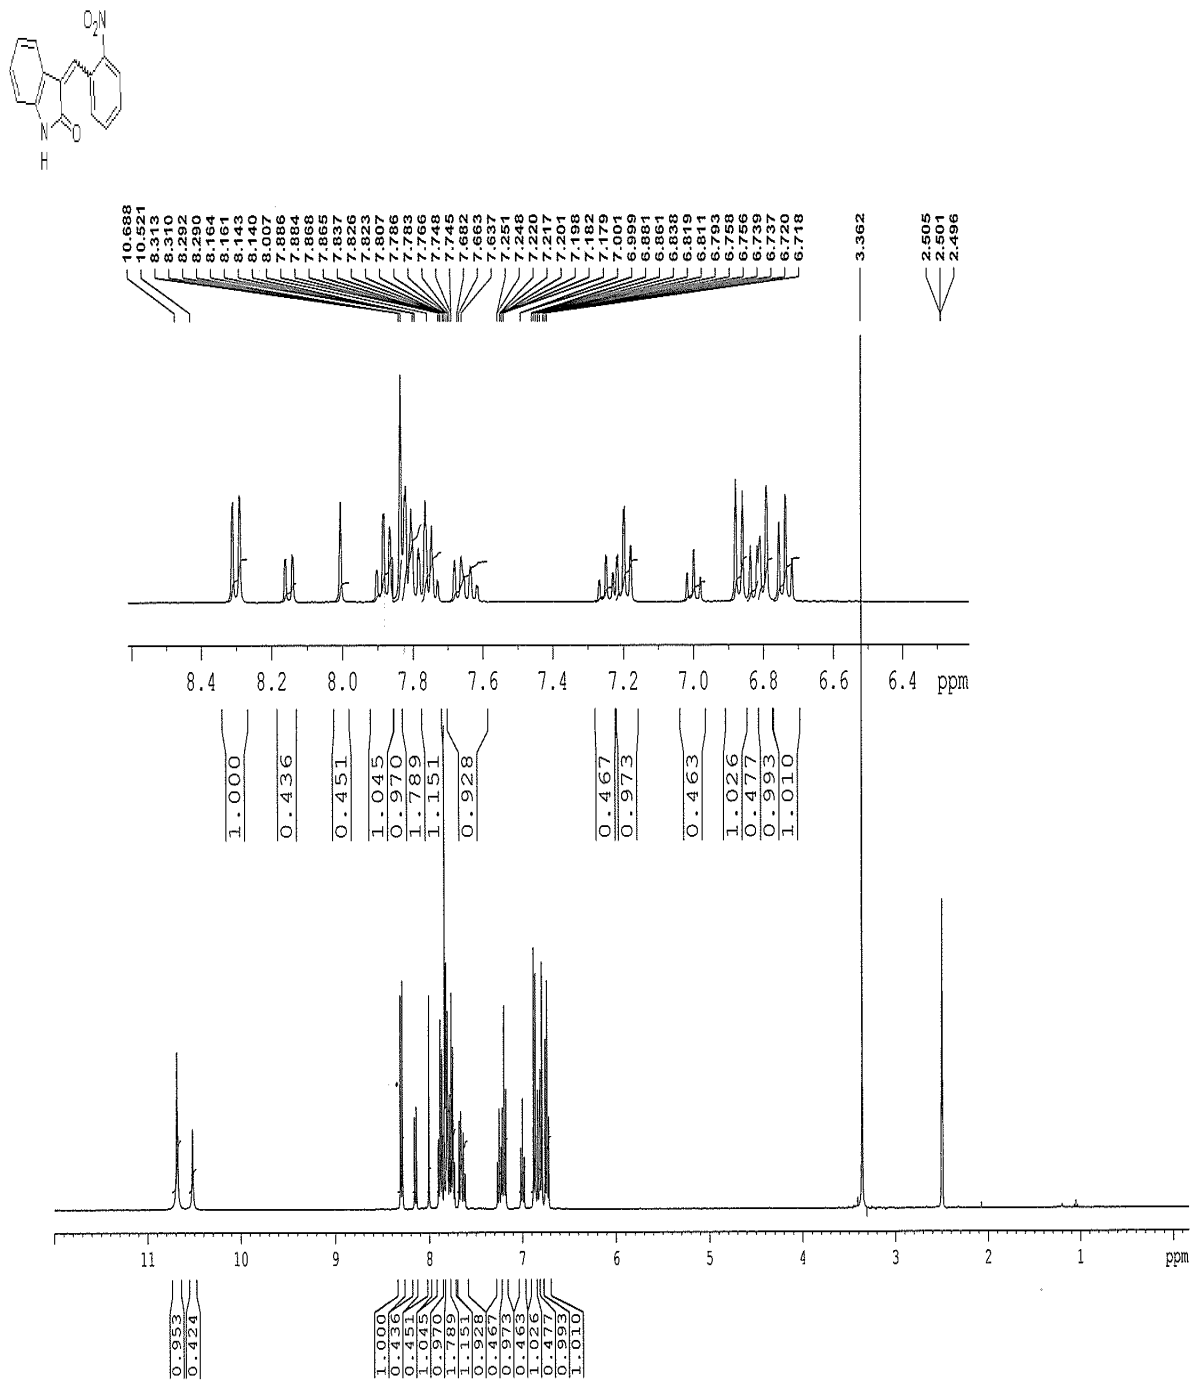

Figure S2.  $^{13}\text{C}$  NMR (300 MHz,  $\text{DMSO-}d_6$ ) of 16.

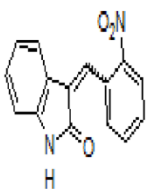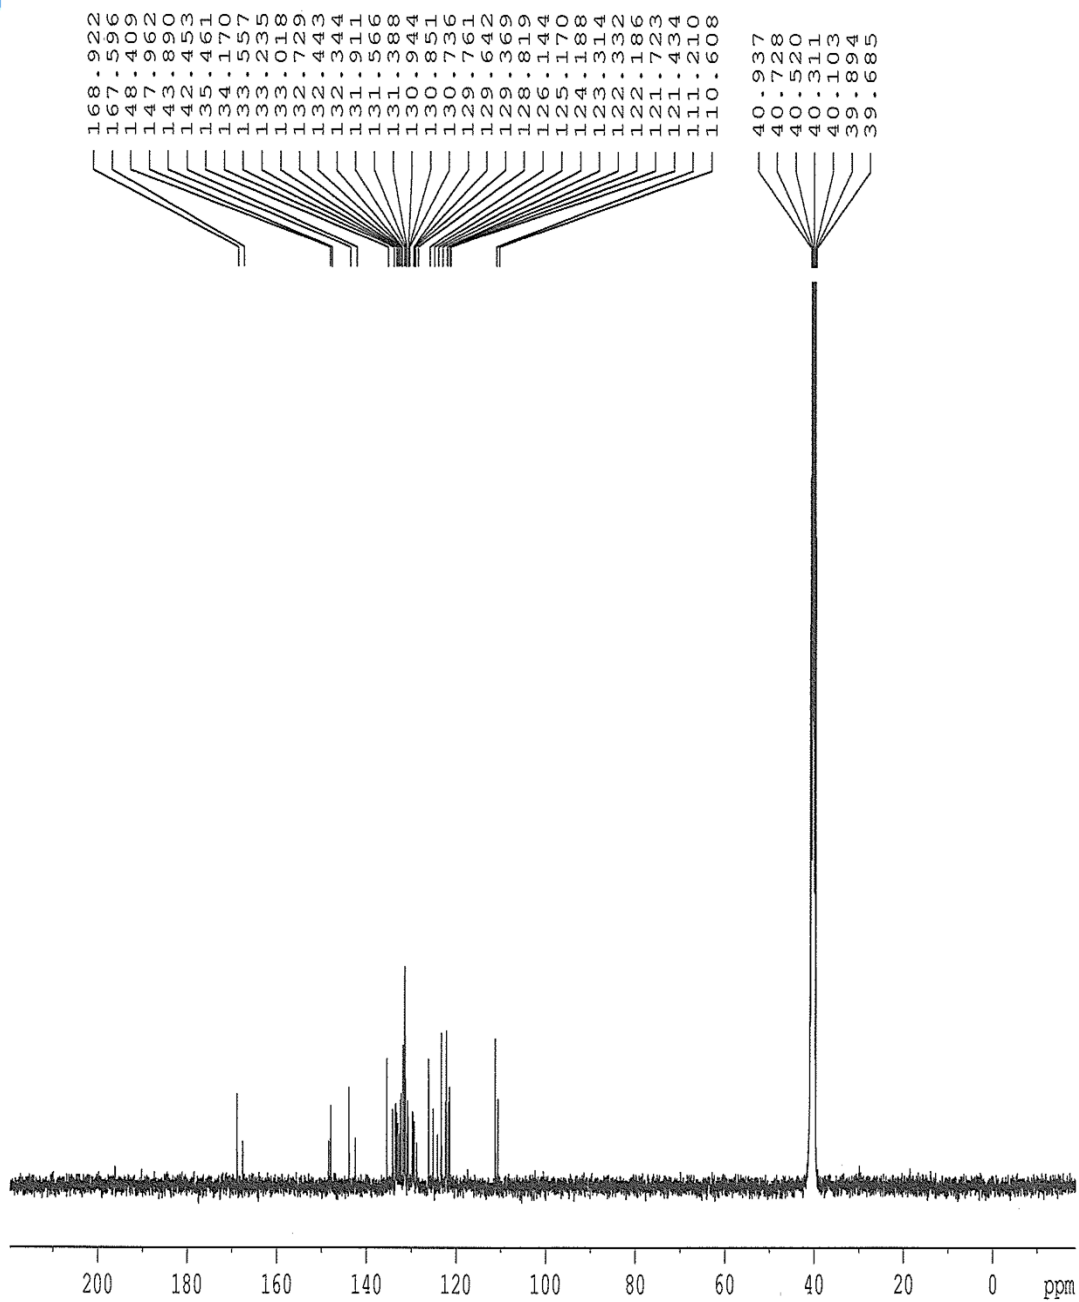

Figure S3.  $^1\text{H}$  NMR (300 MHz,  $\text{DMSO-}d_6$ ) of 15.

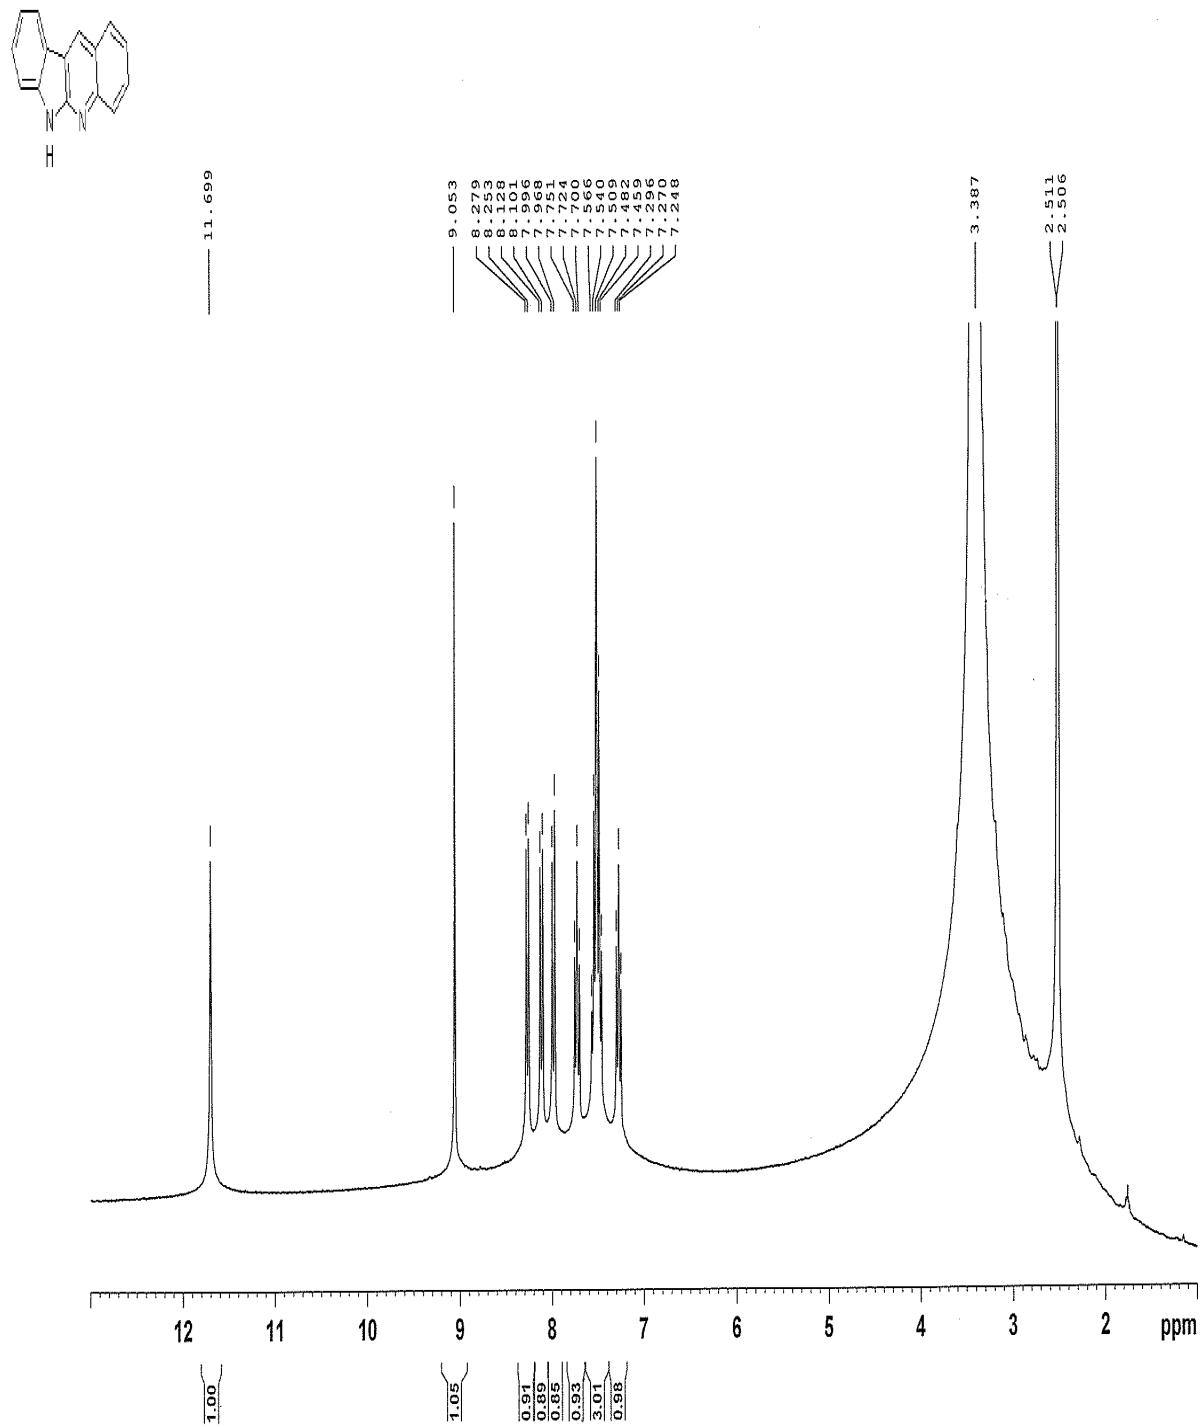

**Figure S4.**  $^{13}\text{C}$  NMR (300 MHz,  $\text{DMSO-}d_6$ ) of **15**.

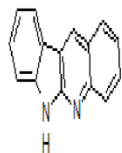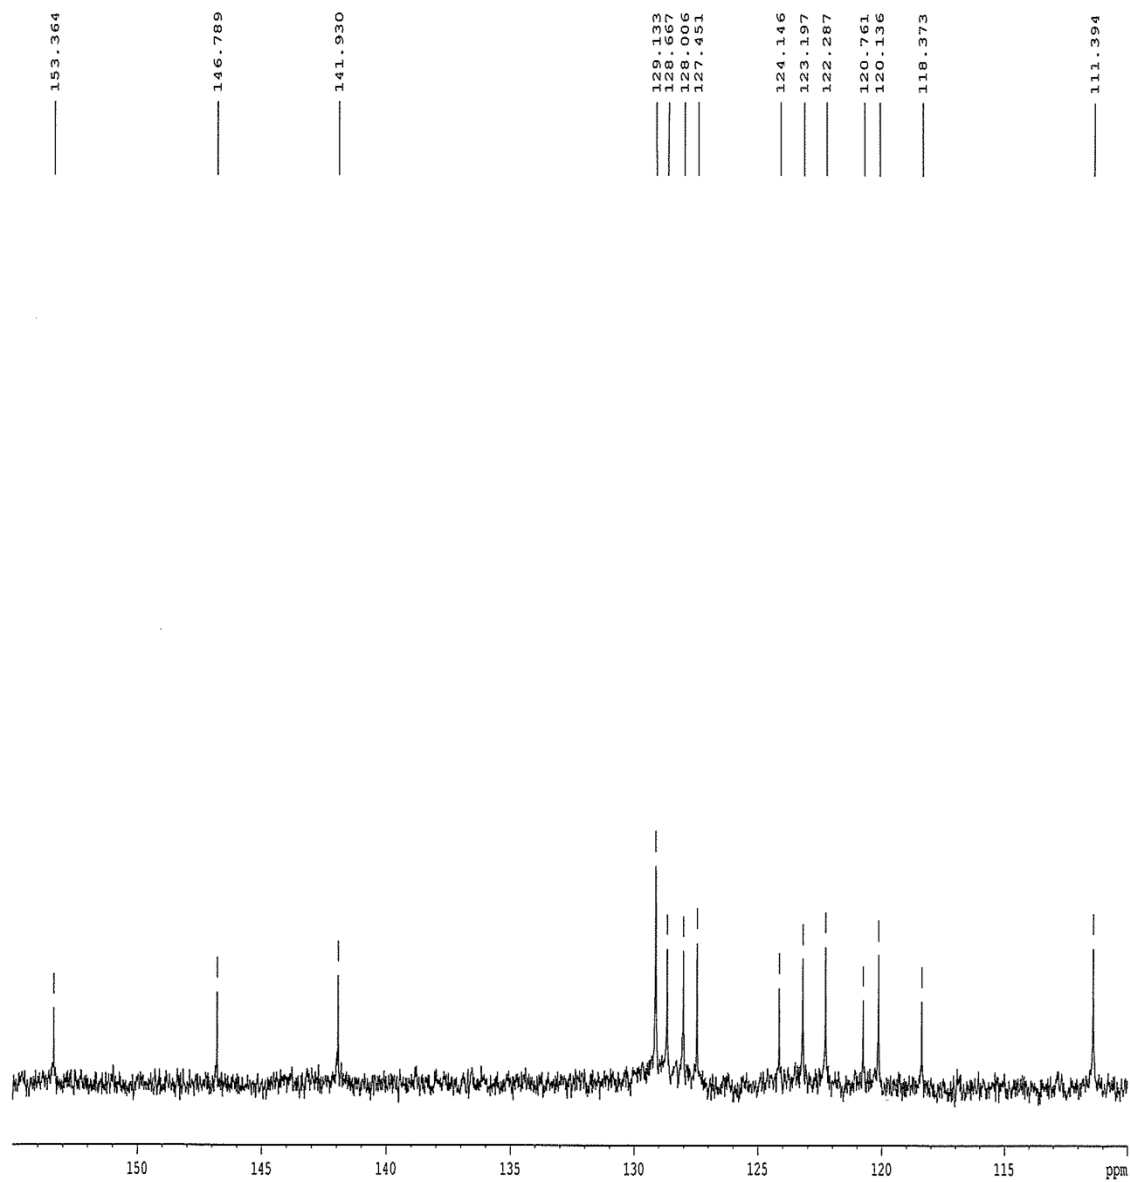

Figure S5.  $^1\text{H}$  NMR (300 MHz,  $\text{DMSO-}d_6$ ) of 19.

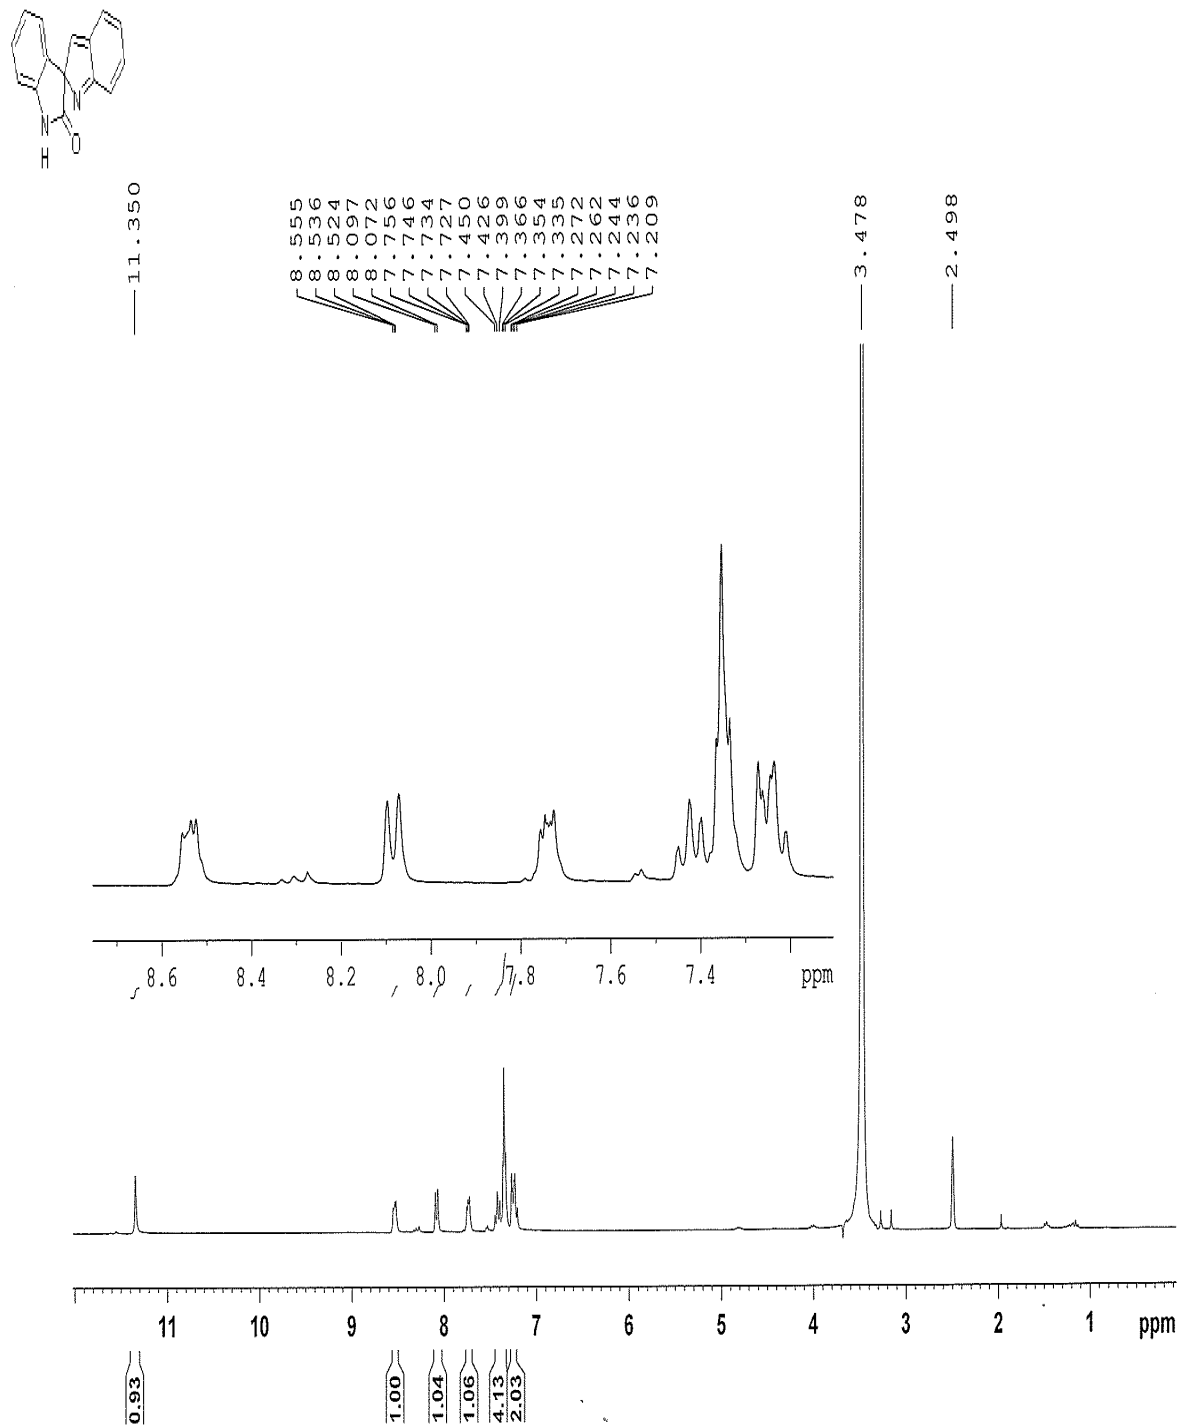

**Figure S6.**  $^{13}\text{C}$  NMR (300 MHz,  $\text{DMSO-}d_6$ ) of **19**.

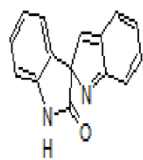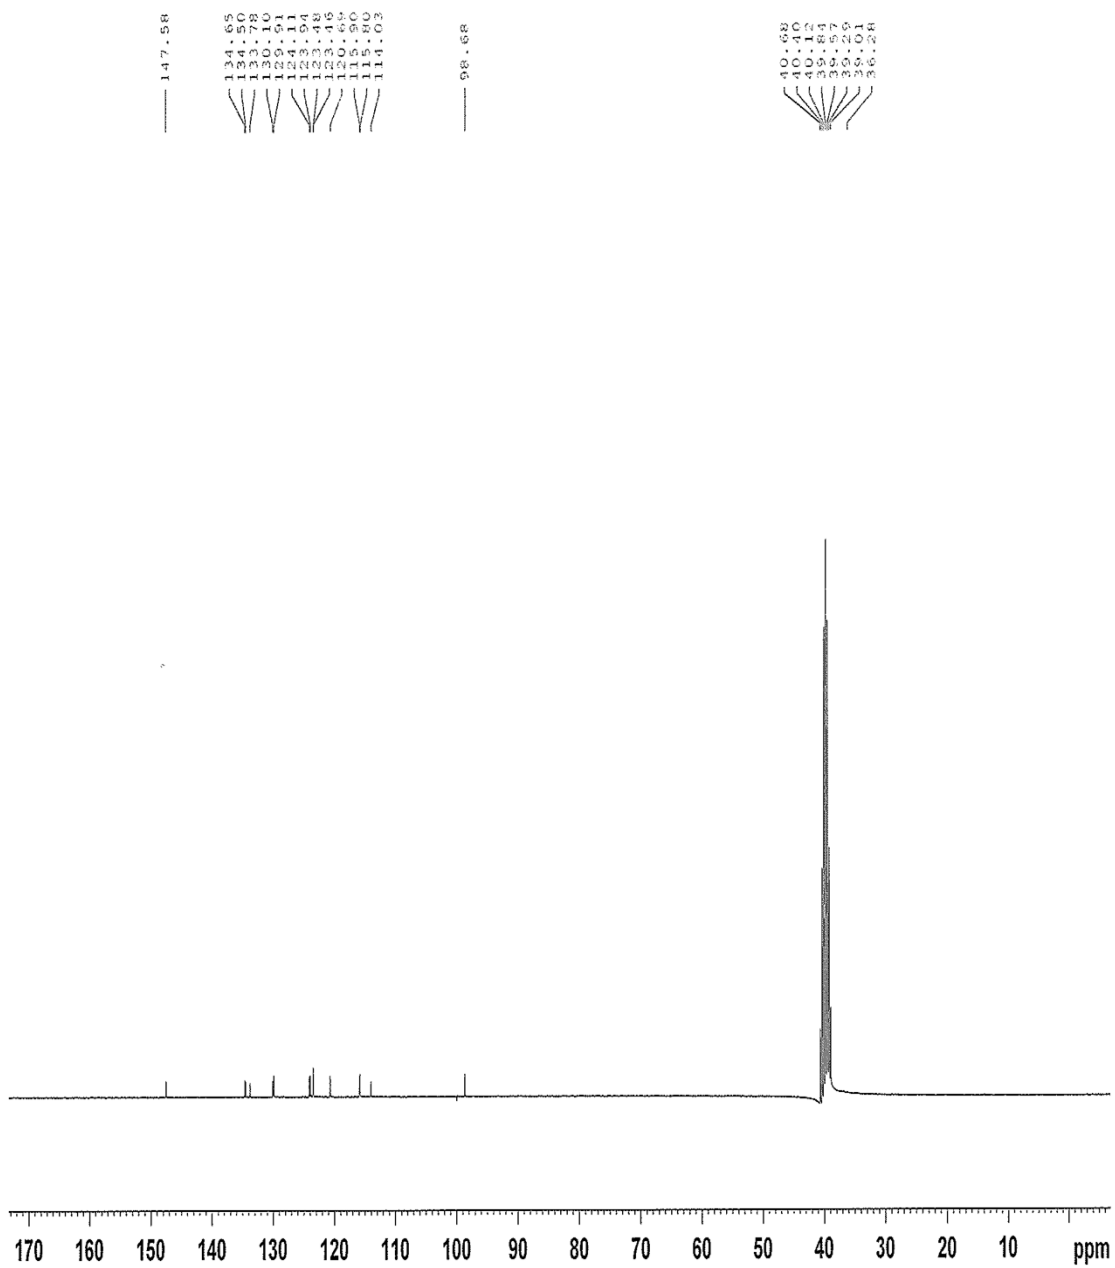

Figure S7.  $^1\text{H}$  NMR (300 MHz,  $\text{DMSO-}d_6$ ) of **20**.

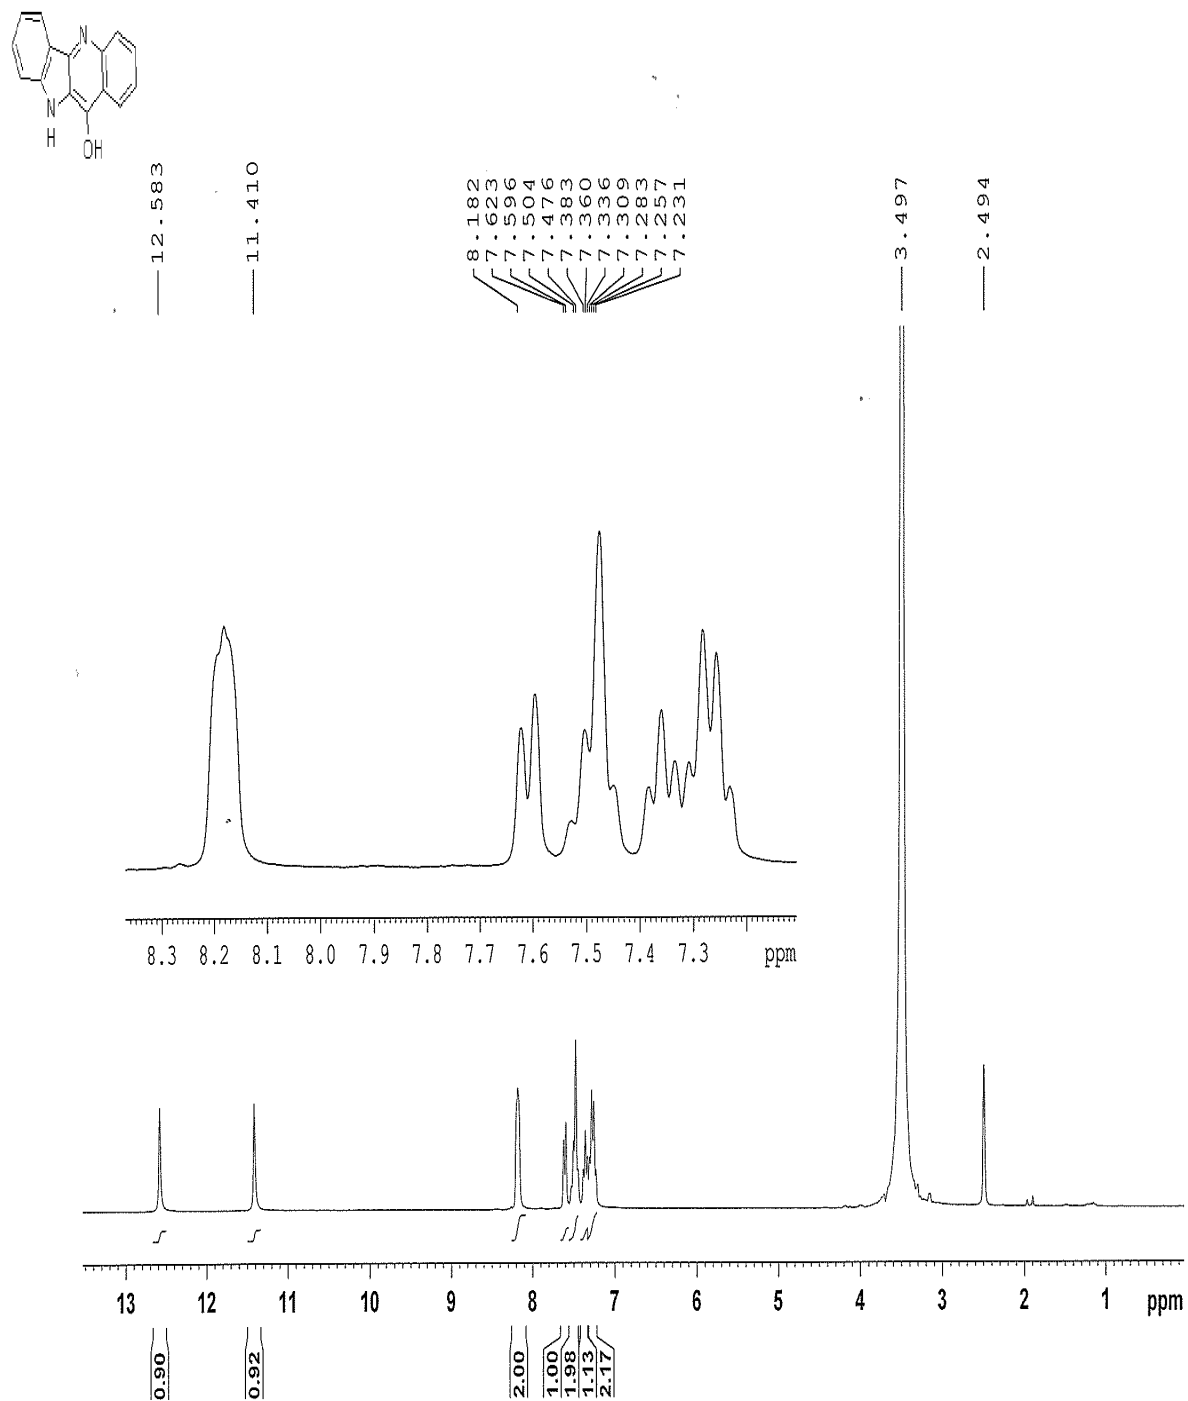



**Figure S8.**  $^{13}\text{C}$  NMR (300 MHz,  $\text{DMSO-}d_6$ ) of **20**.

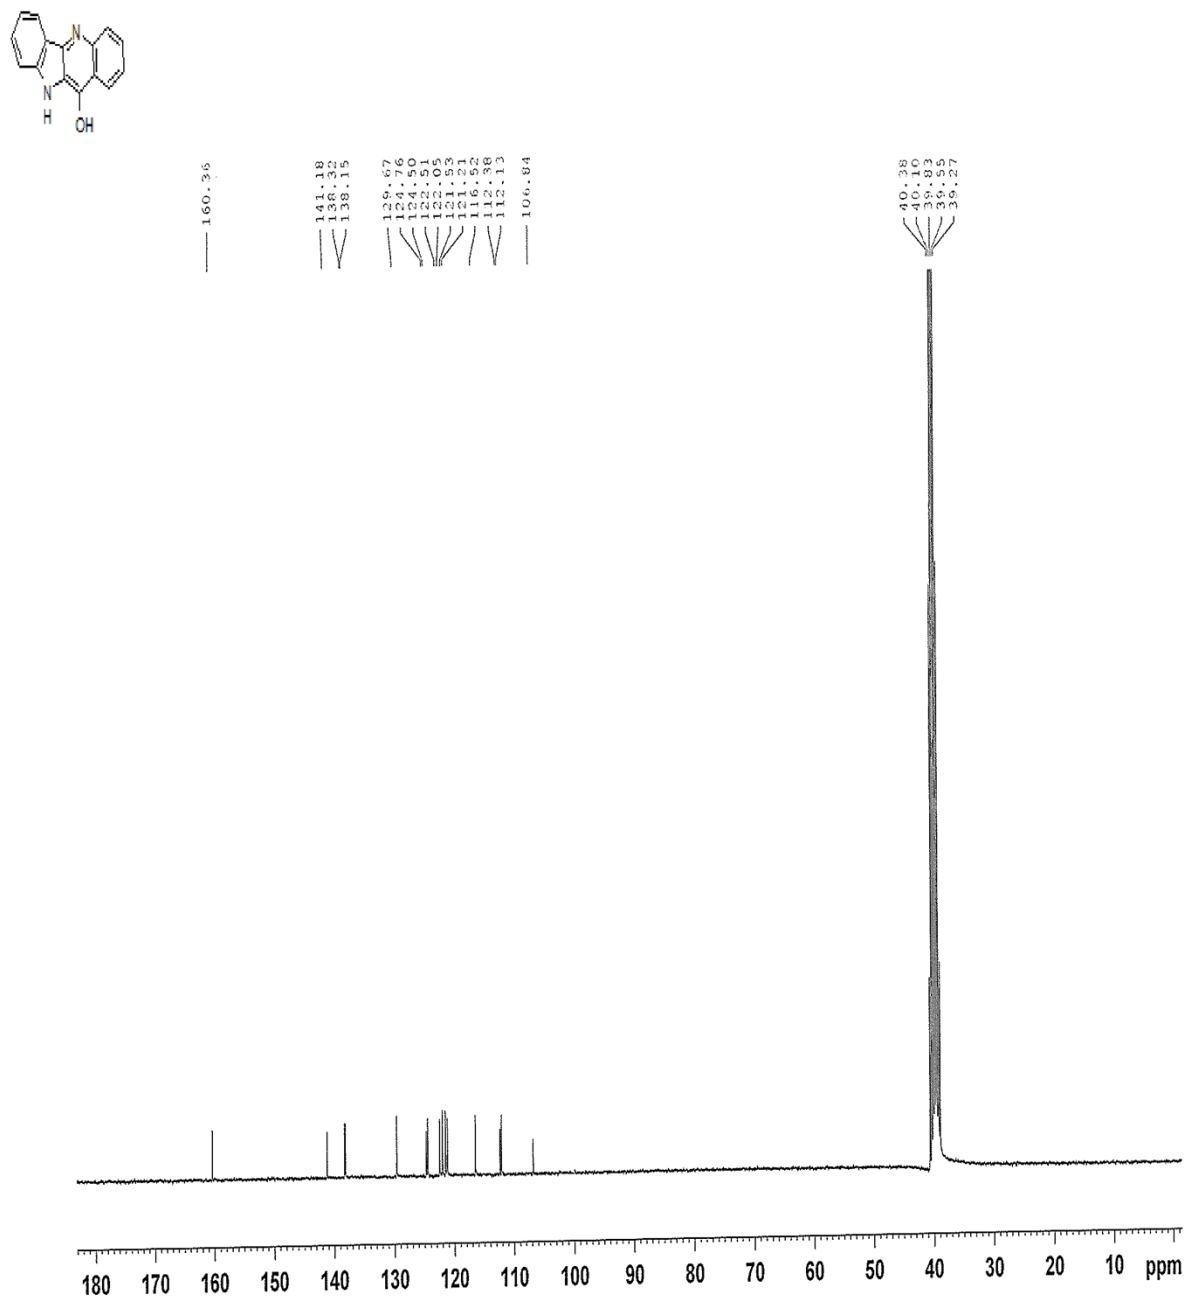

Supplement: c4ra02814g1.pdf [file c4ra02814g1.pdf]
